# Supplementary material
Source: PubMed Central journal article supplement (PMC4085514)
Supplement: cmi201412x1.pdf [file cmi201412x1.pdf]

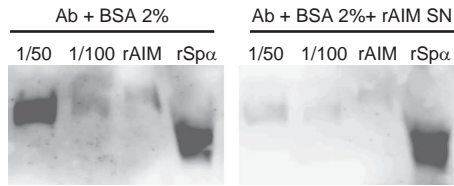

**Supplemental Figure 1** Specificity of the polyclonal anti-AIM antibody was tested by western blot analysis of AIM and Sp $\alpha$  in mouse serum. Diluted serum pools (1 : 50 and 1 : 100 in PBS) were run on SDS-PAGE in duplicate, transferred to nitrocellulose membranes and detected with anti-AIM diluted in blocking buffer (2% BSA in PBS, left panel) or blocking buffer plus rAIM supernatant (right panel), followed by anti-rabbit IgG-HRP. rAIM and rSp $\alpha$  were used as positive controls. AIM, apoptosis inhibitor of macrophage; BSA, bovine seroalbumin; HRP, horseradish peroxidase; PBS, phosphate-buffered saline.
